# Supplementary material for: Clarification on the Reactivity of Diaryl Diselenides toward Hexacyclohexyldilead under Light
Source: MDPI journal article supplement (doi:10.3390/molecules26206265), 2021-10-16

Supplementary Materials

# Clarification on the Reactivity of Diaryl Diselenides toward Hexacyclohexyldilead under Light

Vu Thai Hung, Cong Chi Tran, Yuki Yamamoto, Shintaro Kodama \*, Akihiro Nomoto, and Akiya Ogawa \*

Department of Applied Chemistry, Graduate School of Engineering, Osaka Prefecture University,  
1-1 Gakuen-cho, Nakaku, Sakai, Osaka 599-8531, Japan; vth261@gmail.com (V.T.H.); mz105131@edu.osakafu-  
u.ac.jp (C.C.T.); syb02137@edu.osakafu-u.ac.jp (Y.Y.); nomoto@chem.osakafu-u.ac.jp (A.N.)

\* Correspondence: skodama@chem.osakafu-u.ac.jp (S.K.); ogawa@chem.osakafu-u.ac.jp (A.O.)

## Contents

Copies of  $^1\text{H}$  and  $^{13}\text{C}\{^1\text{H}\}$  NMR spectra

... 2–12

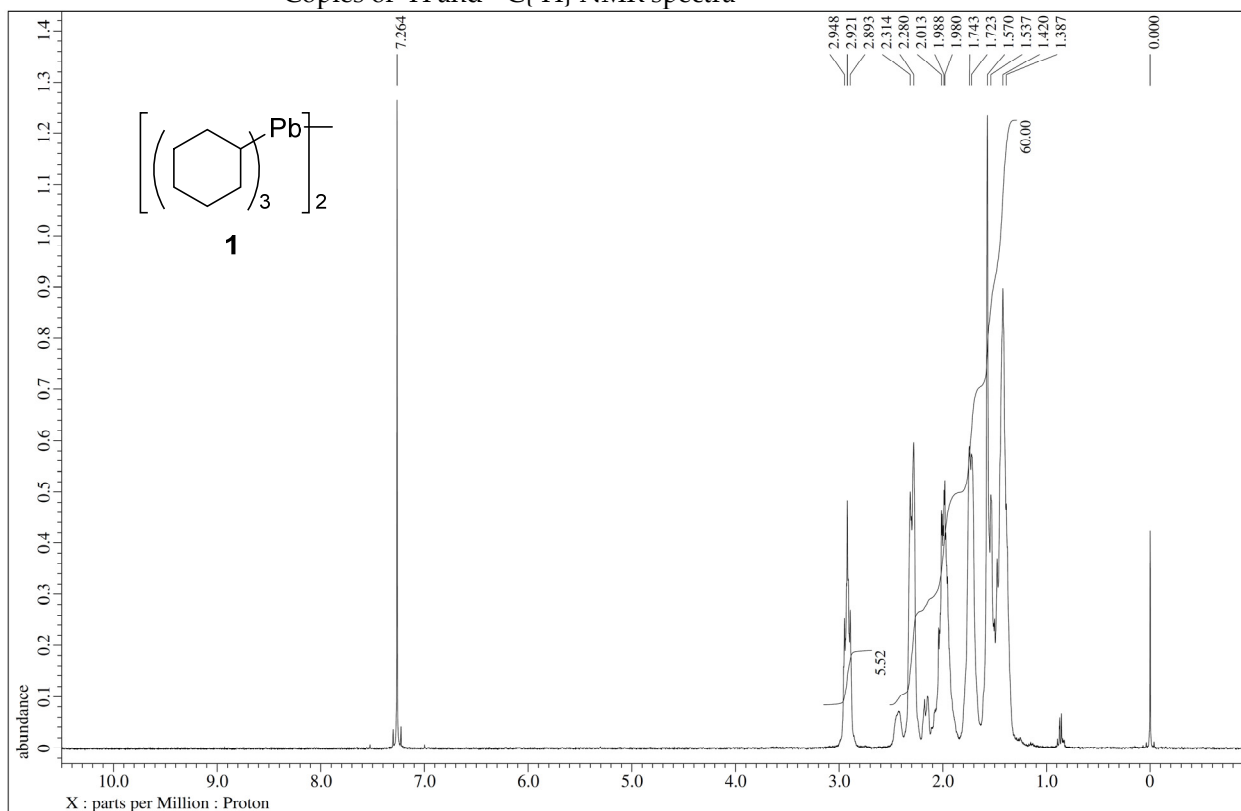

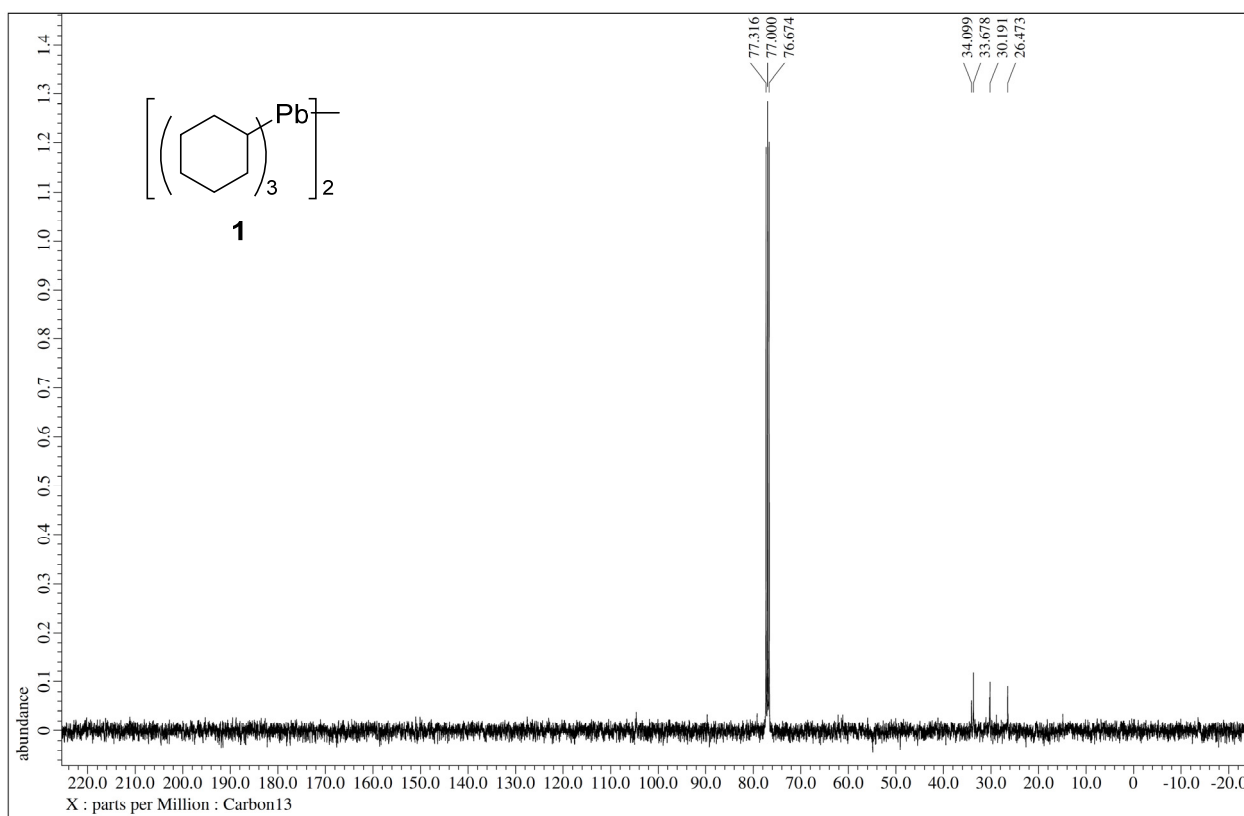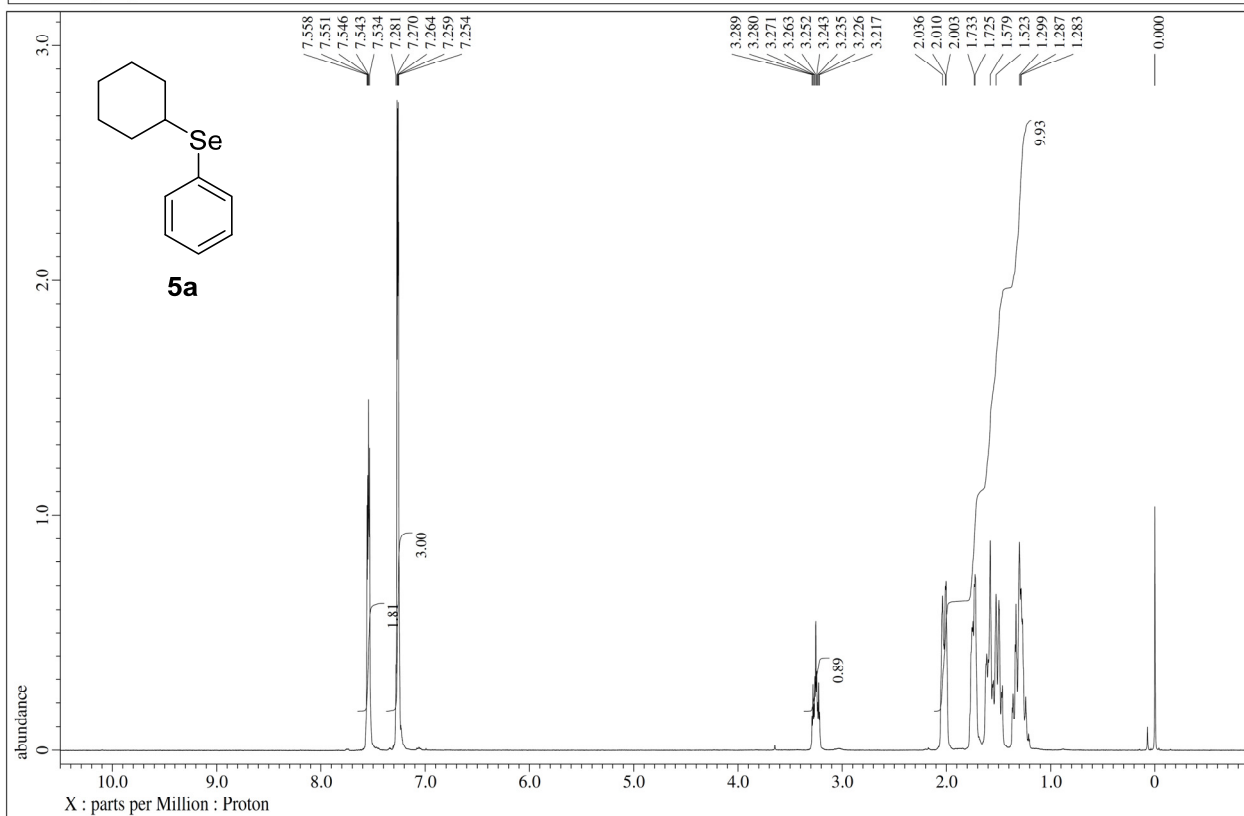

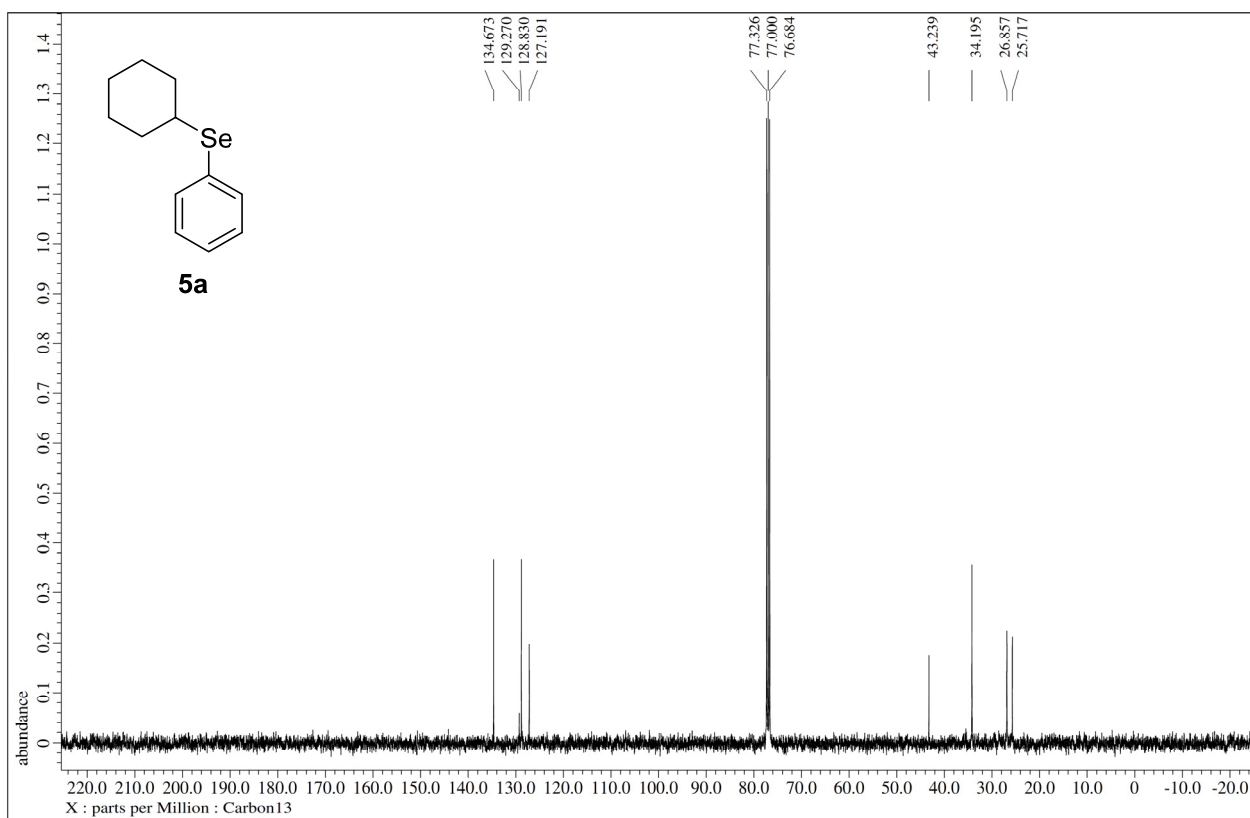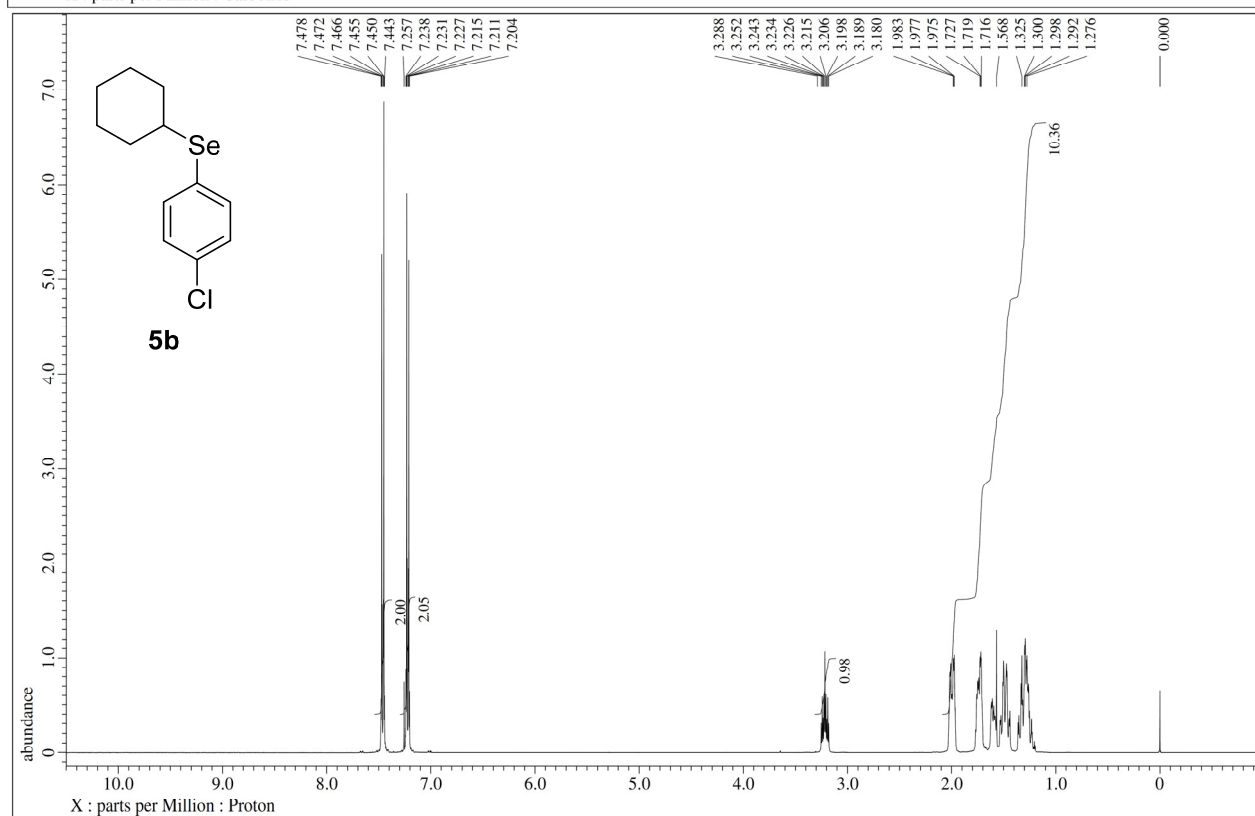

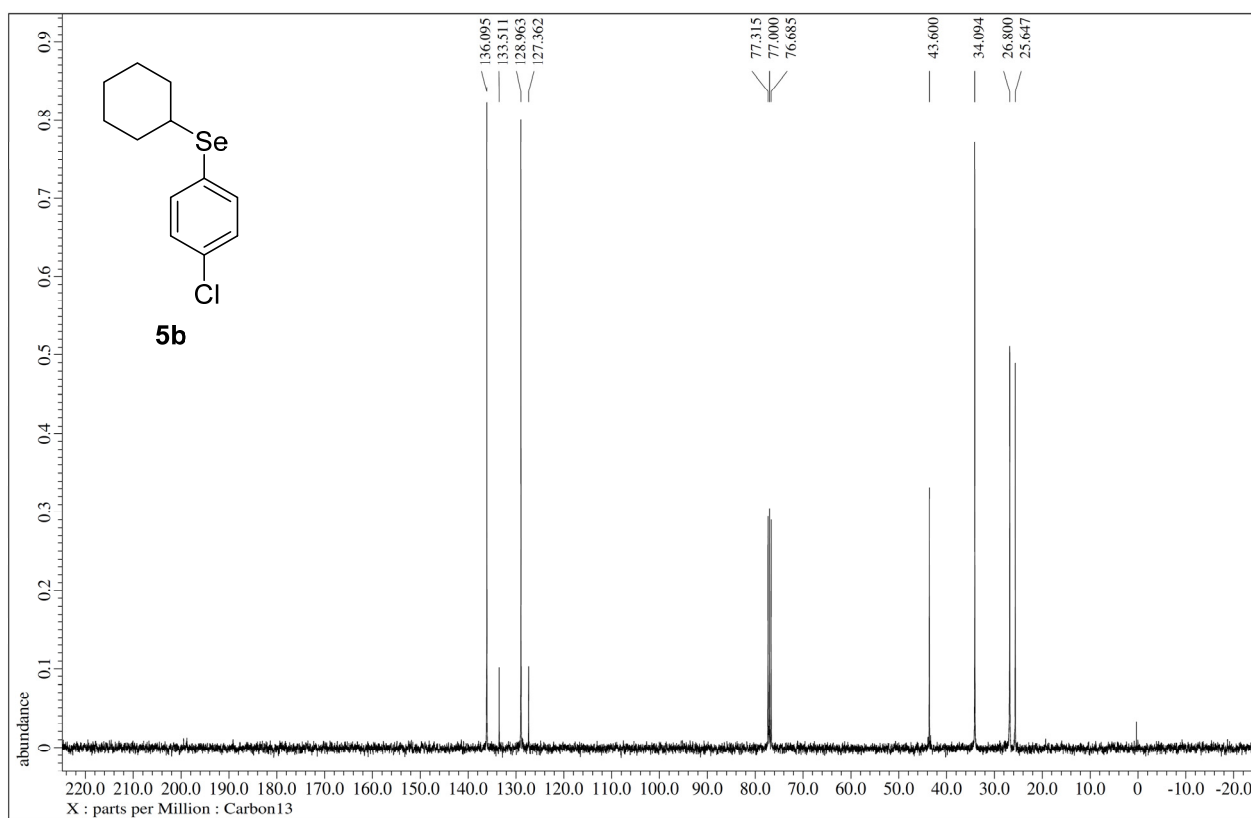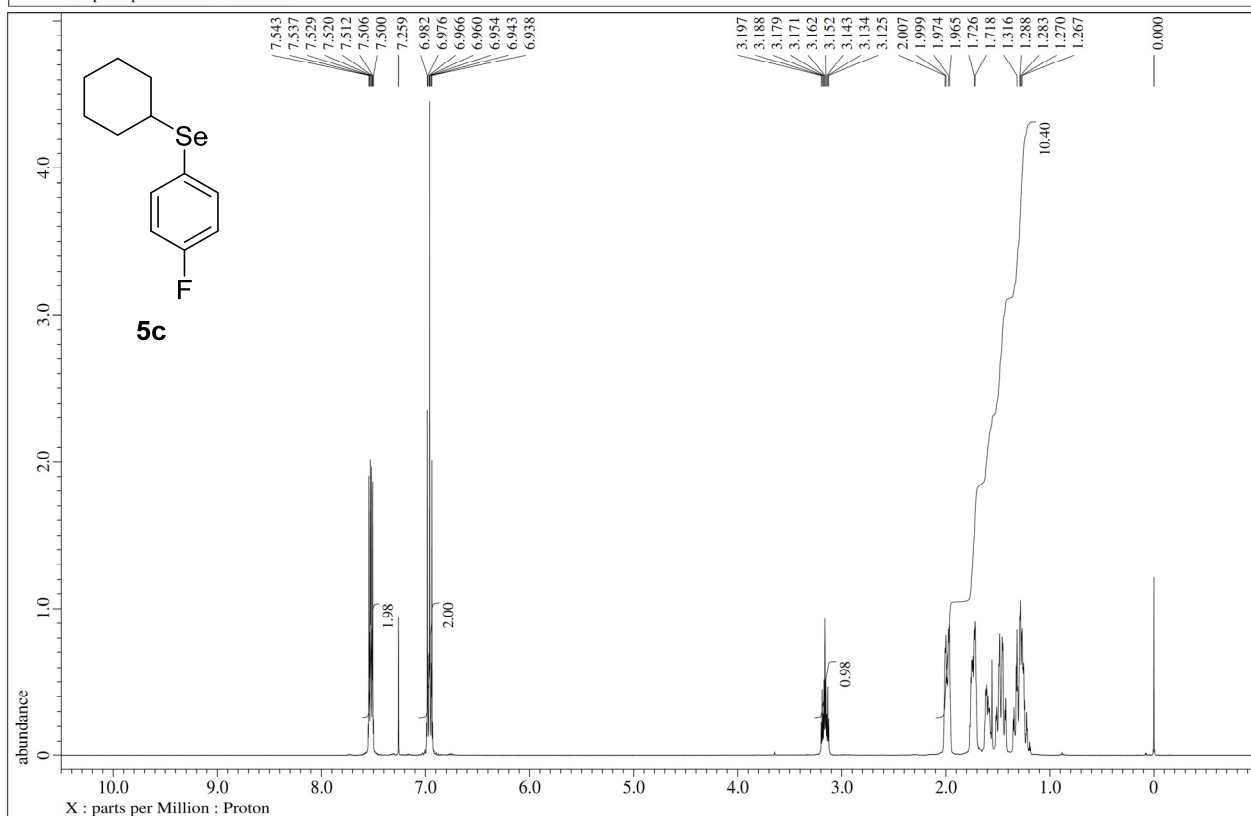

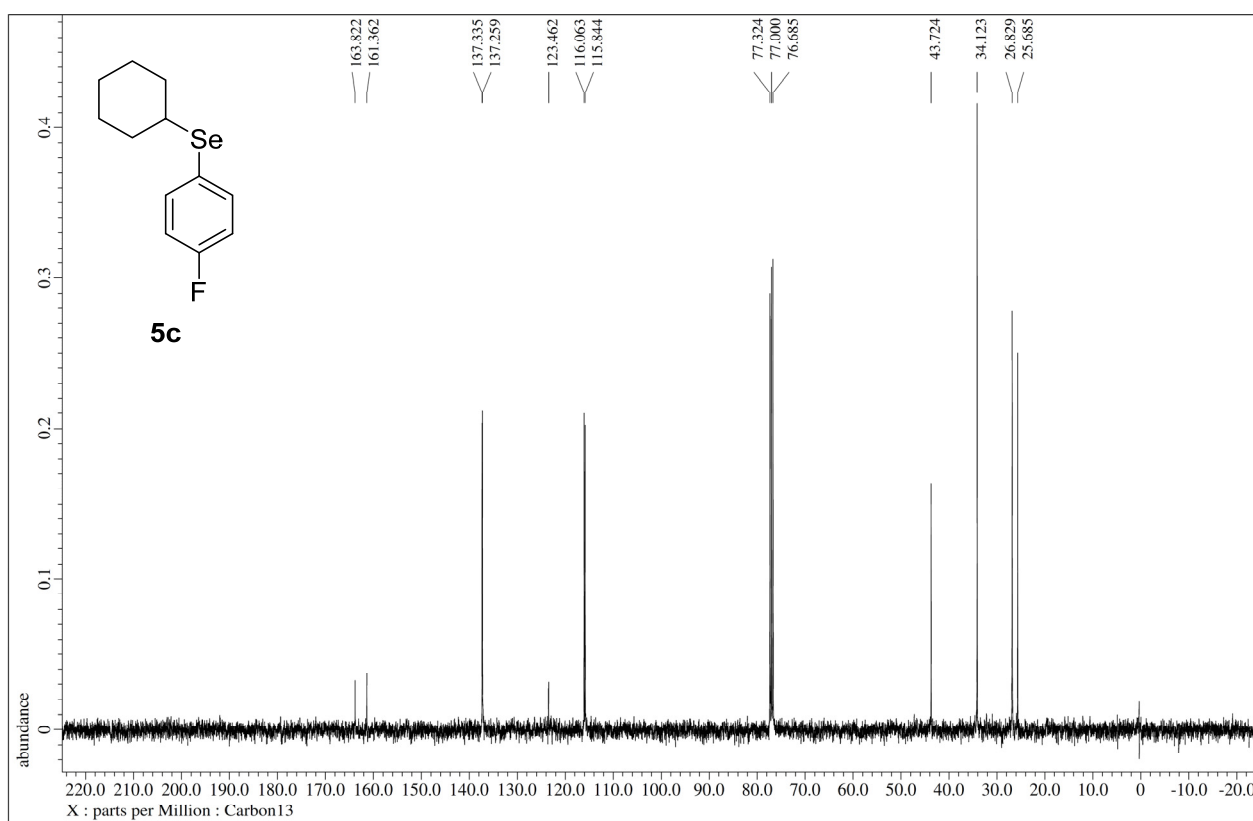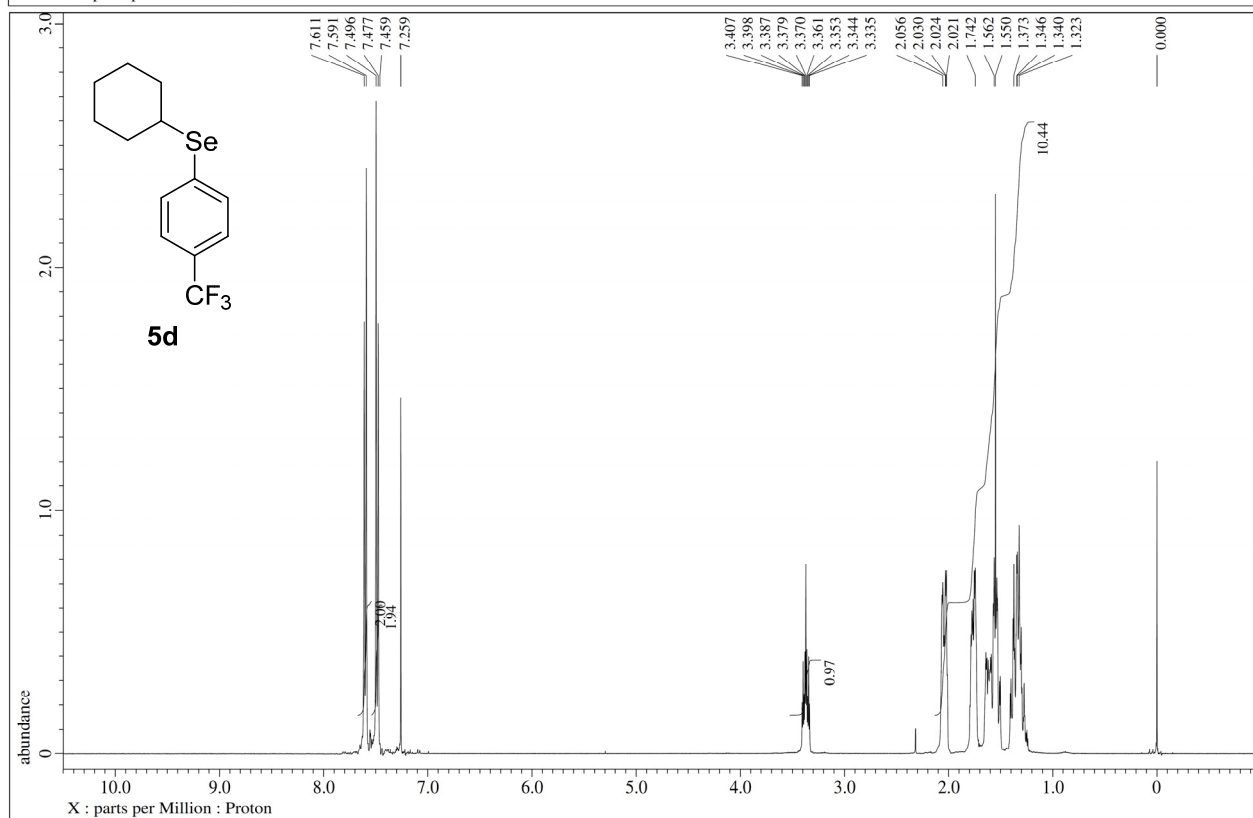

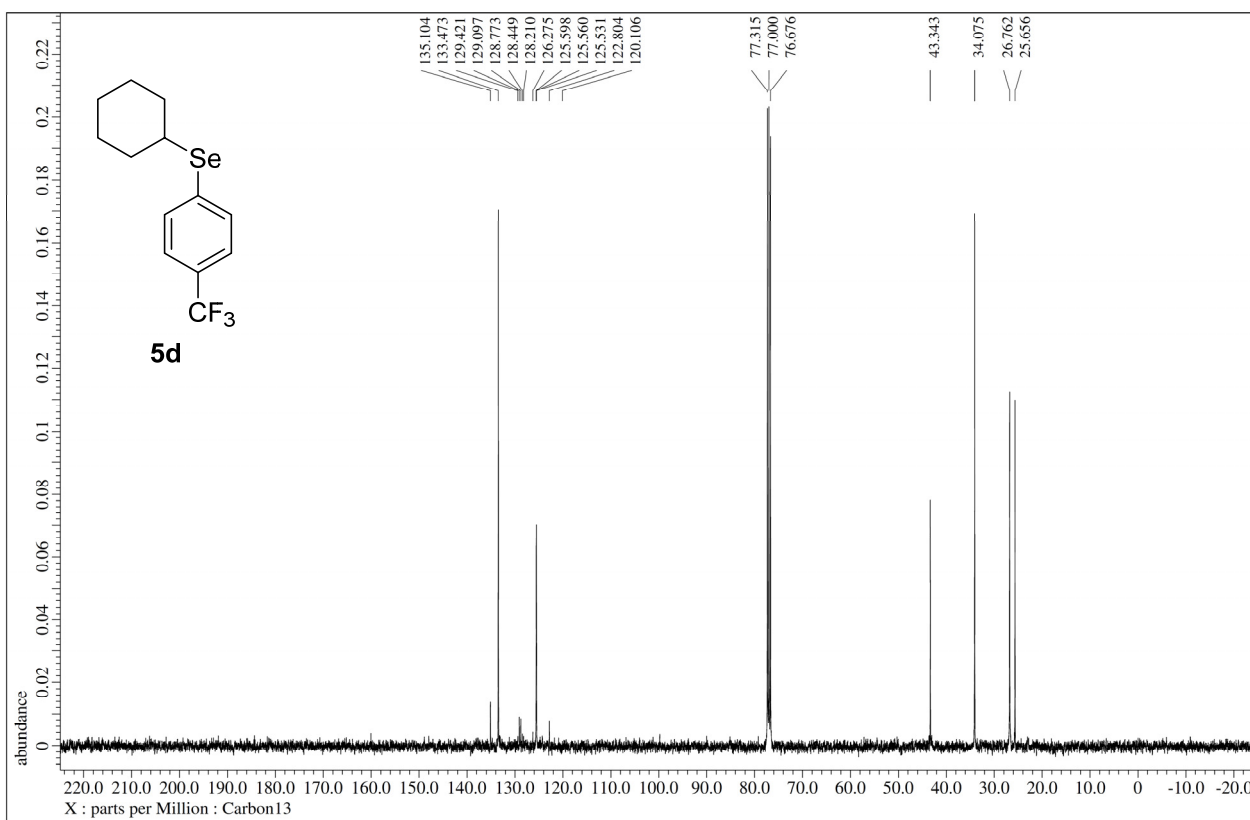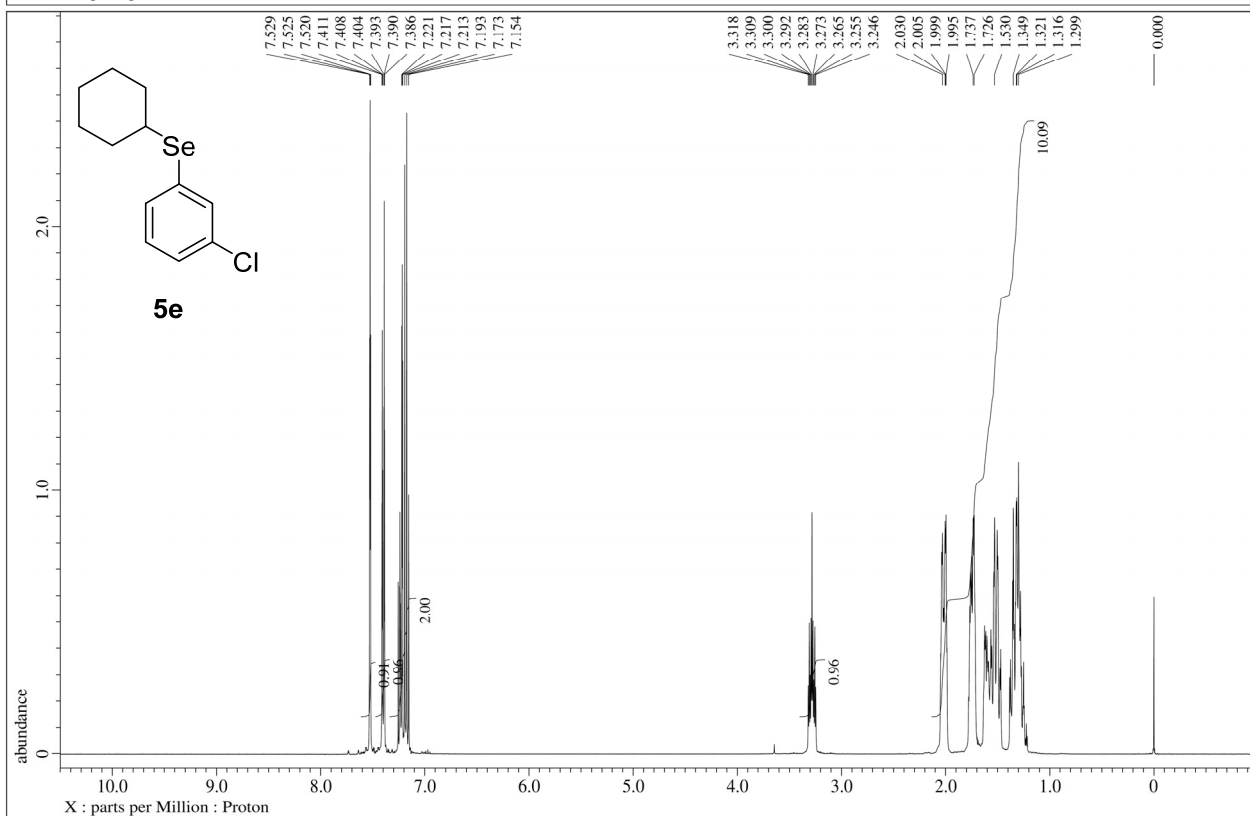

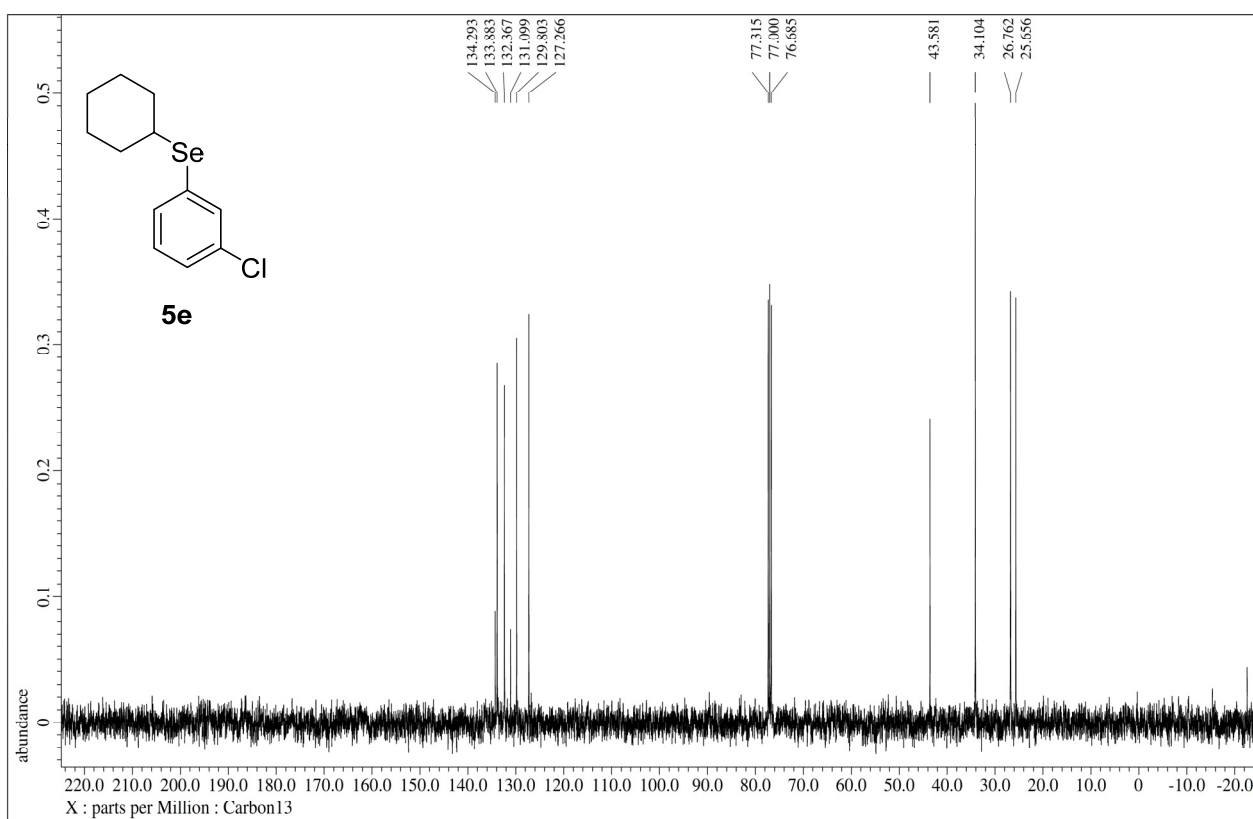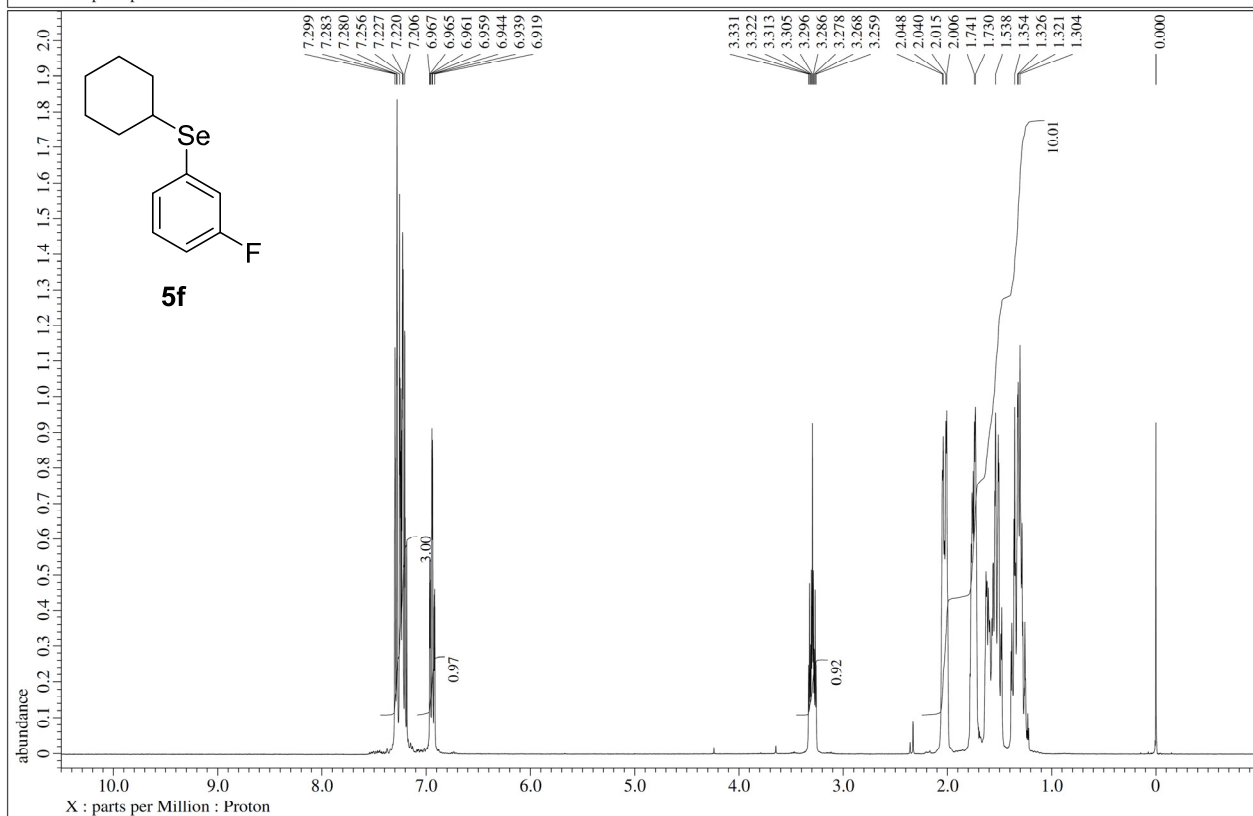

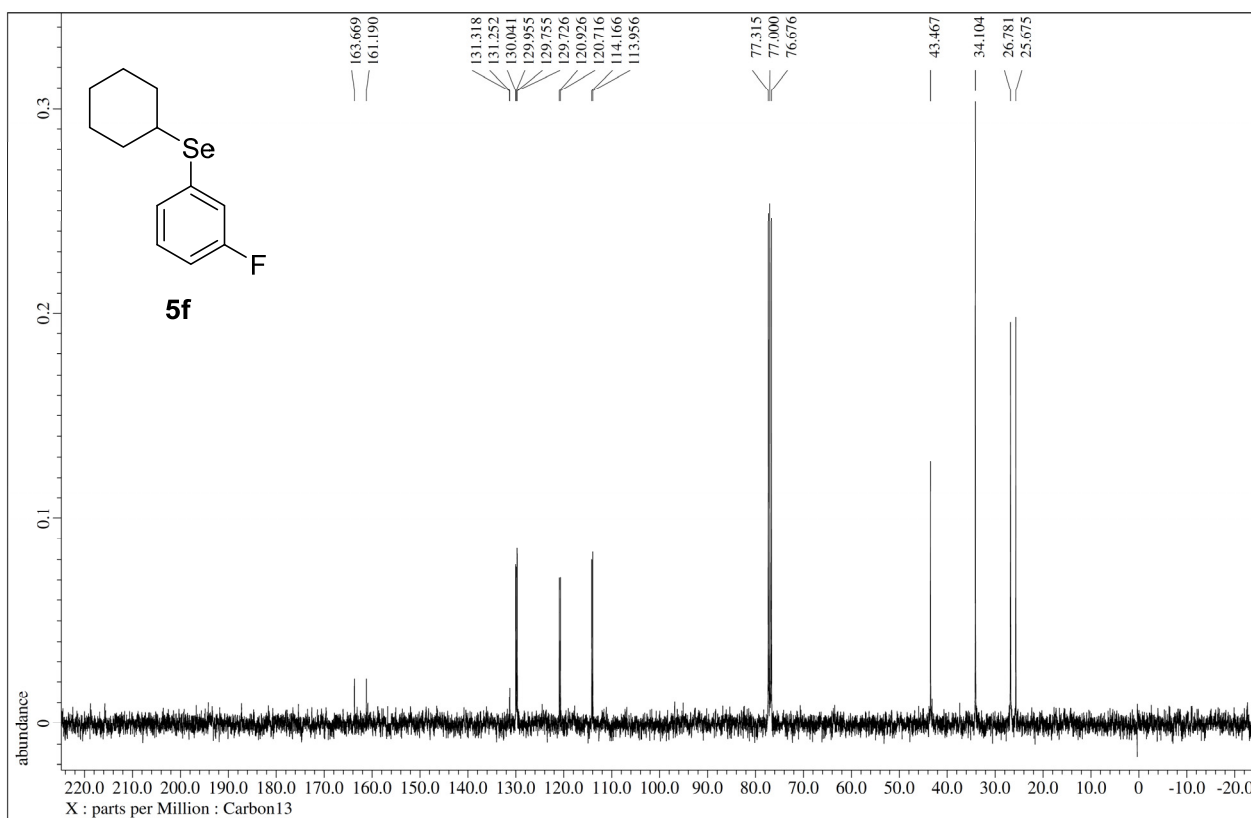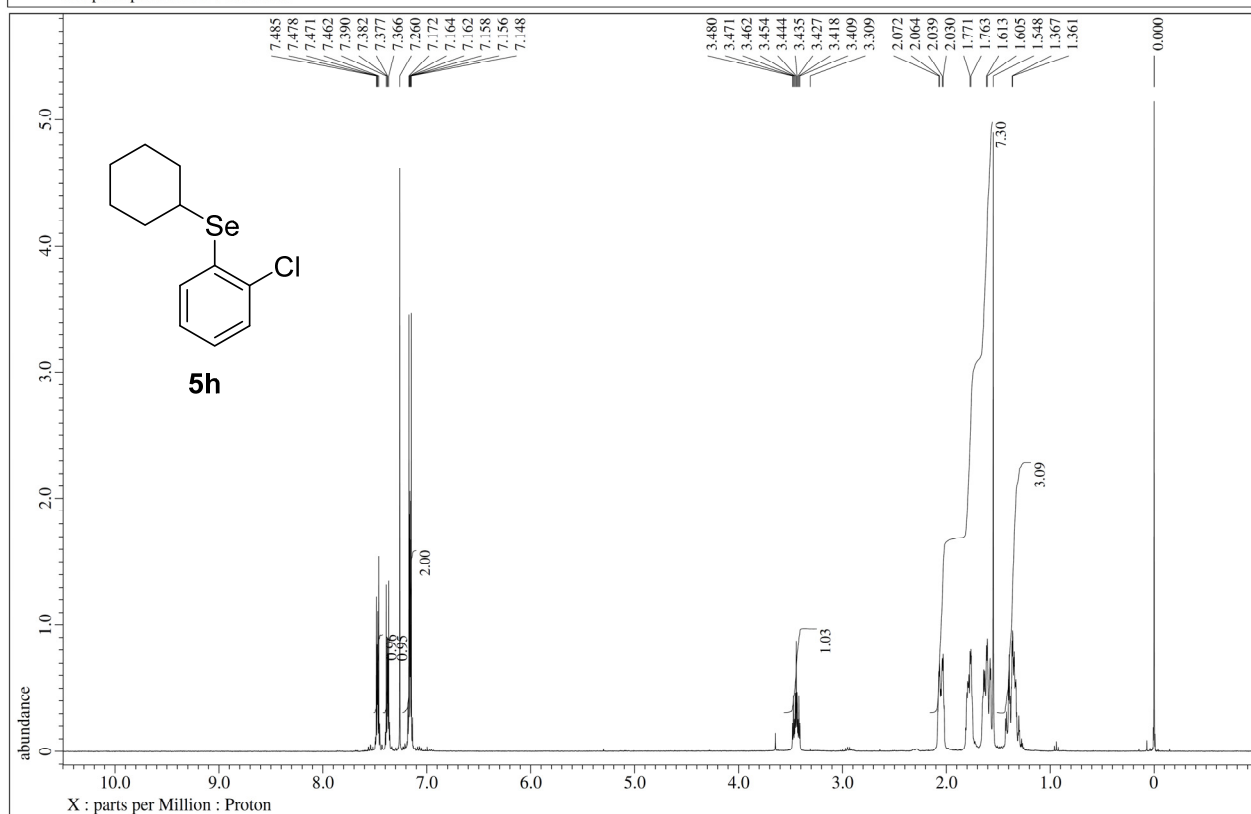



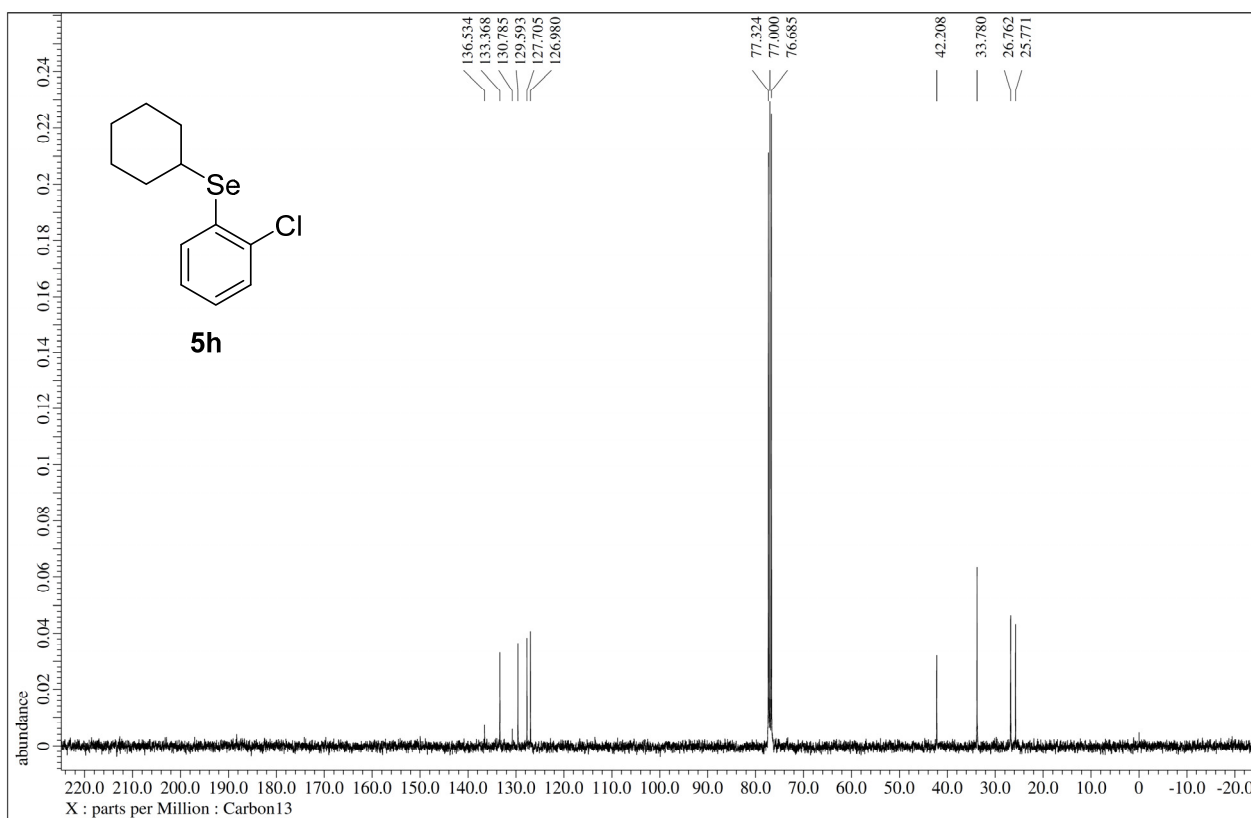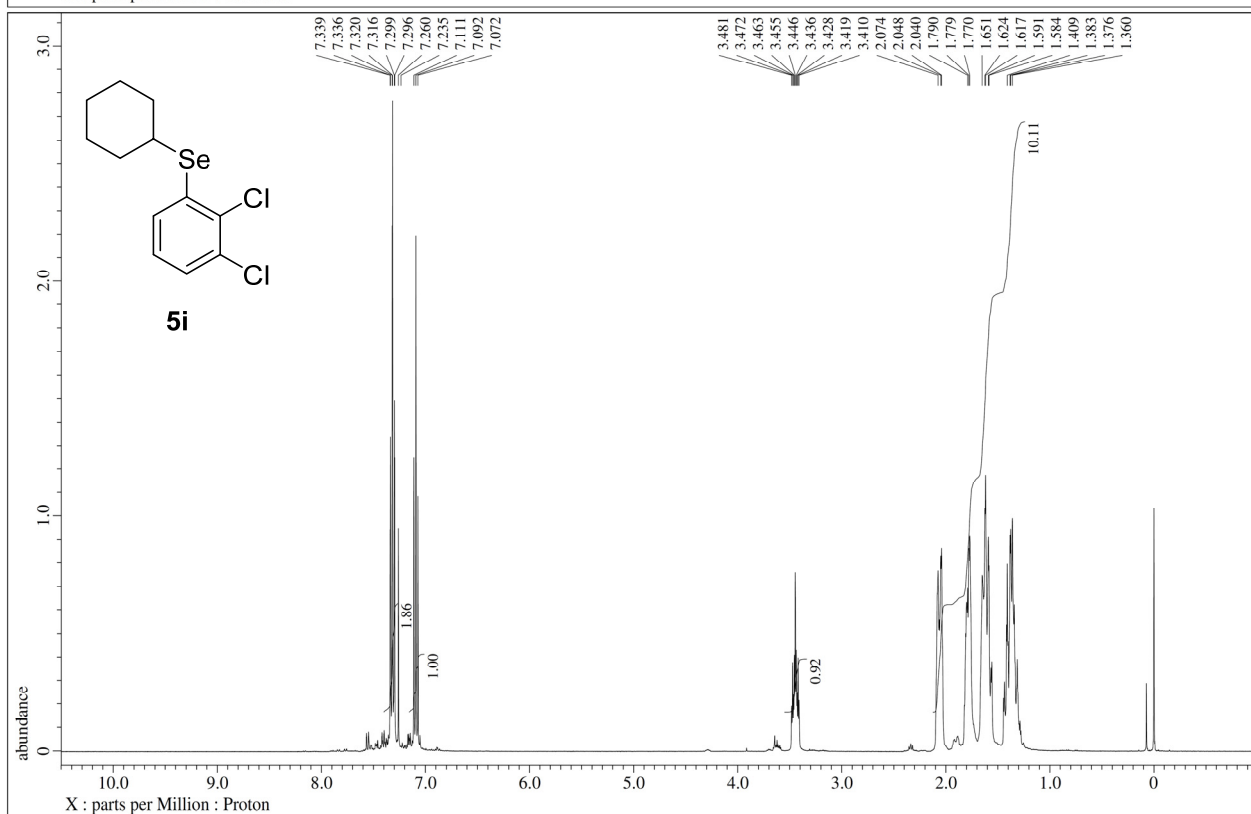

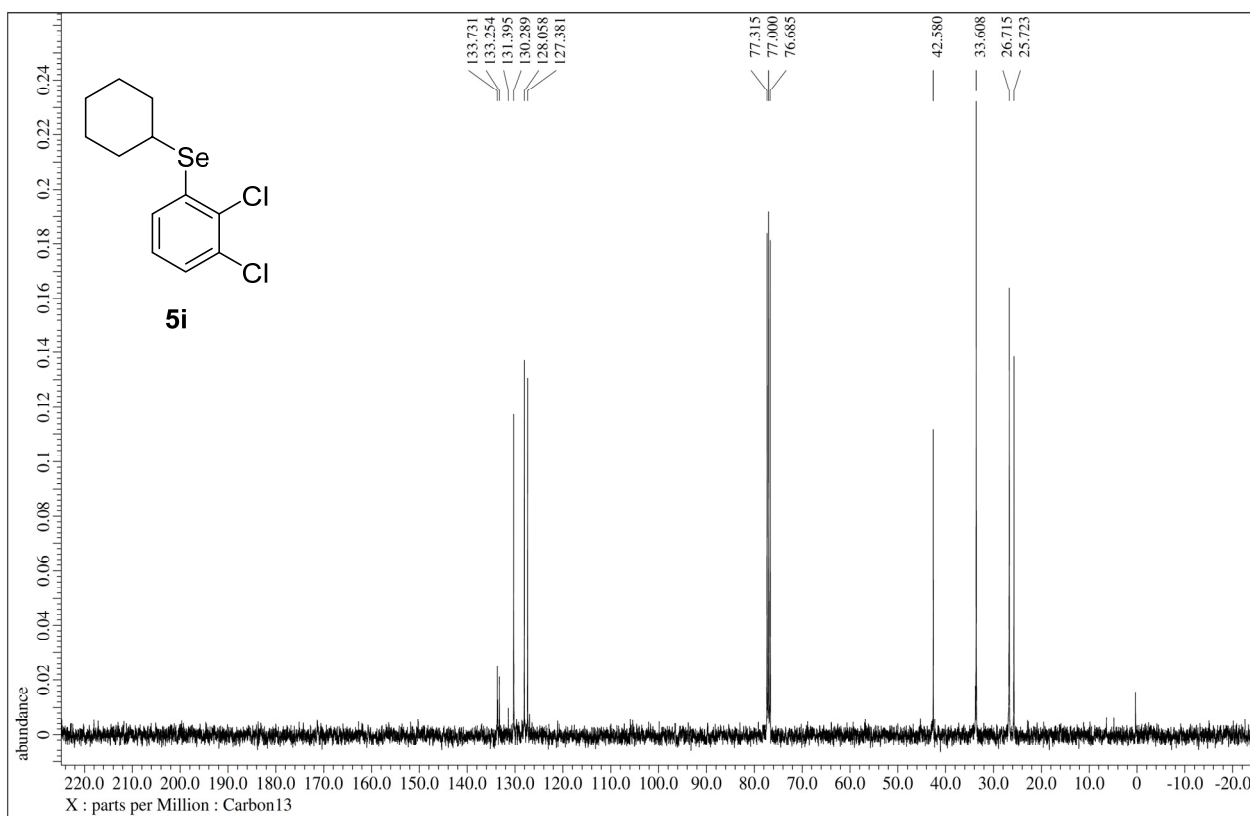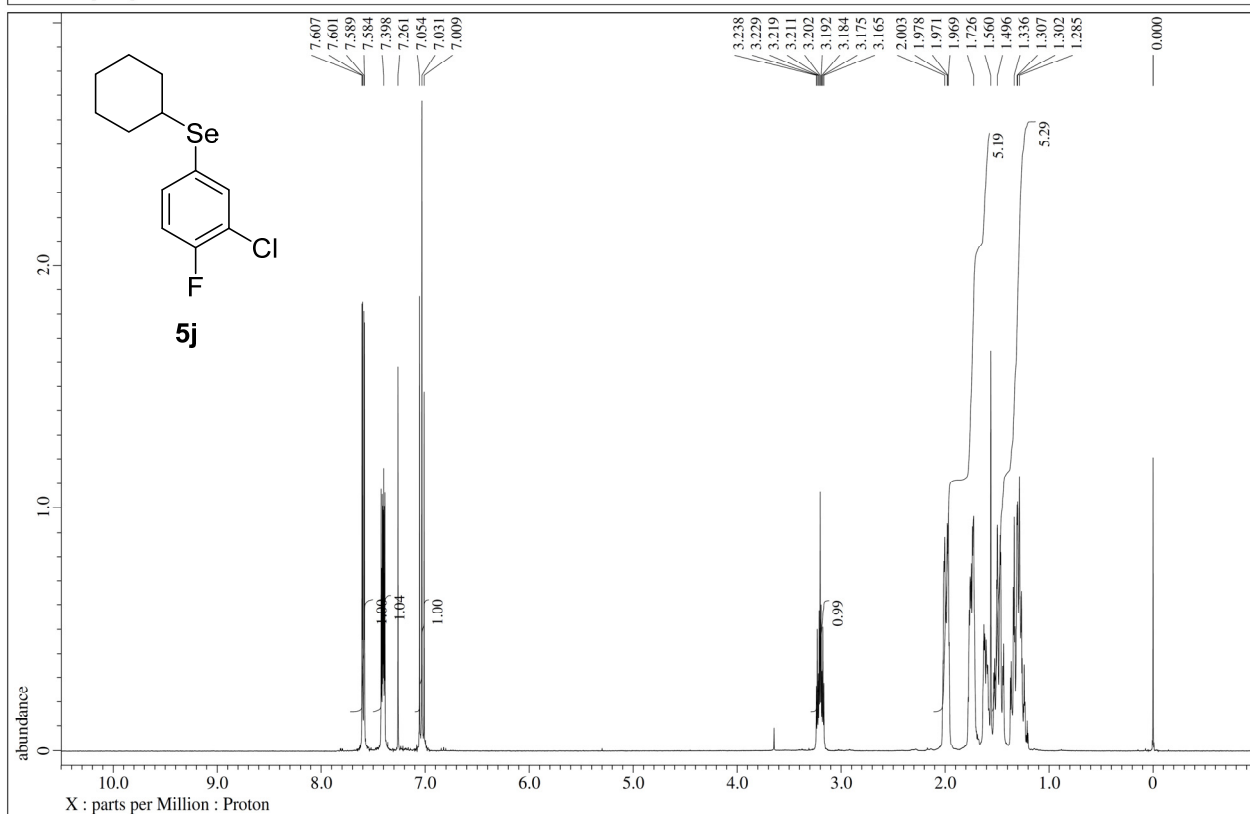

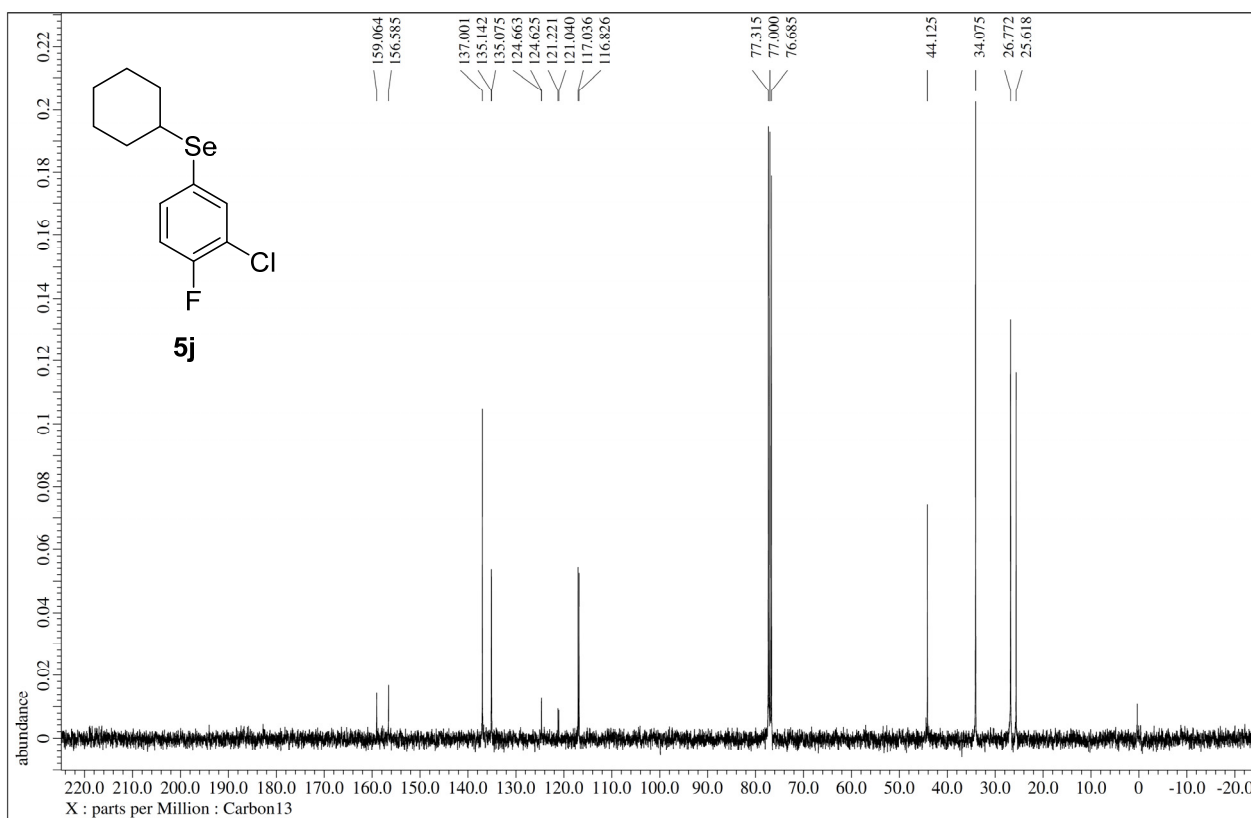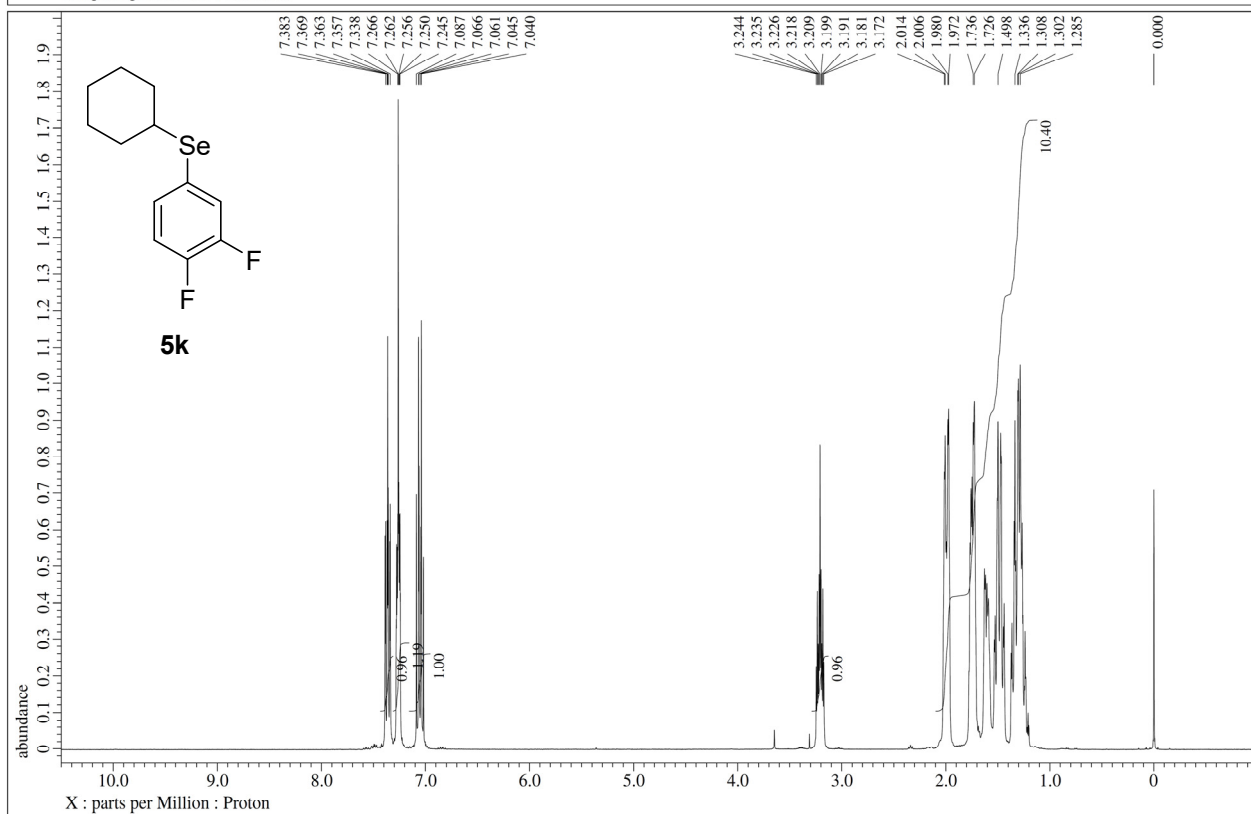

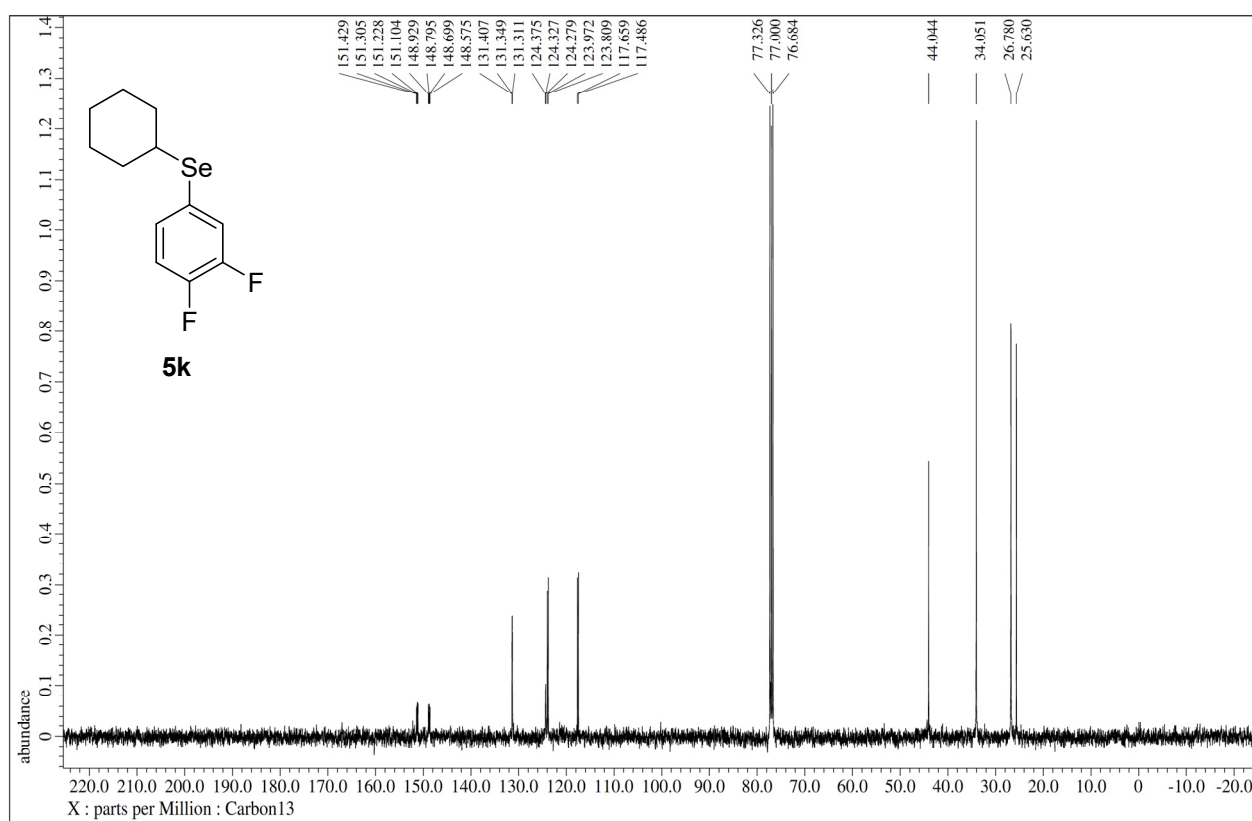

Supplement: s1 [file s1]
